# Supplementary material for: Synthesis and characterization of diphenylcarbazide-siliceous mesocellular foam and its application as a novel mesoporous sorbent for preconcentration and trace detection of copper and cadmium ions
Source: Royal Society of Chemistry journal article supplement (doi:10.1039/c5ra10240e), 2015-01-01
Supplement: c5ra10240e1.pdf [file c5ra10240e1.pdf]

## Electronic Supplementary Material

### **Synthesis and characterization of diphenylcarbazide-siliceous mesocellular foam and its application as a novel mesoporous sorbent for preconcentration and trace detection of copper and cadmium ions**

Mohammad Behbahani<sup>1,\*</sup>, Azam Aliakbari<sup>1</sup>, Sara Salimi<sup>1</sup>

*<sup>1</sup>Department of Chemistry, Shahid Beheshti University, Evin, Tehran, Iran*

#### **Corresponding authors:**

\* Mohammad Behbahani. Tel.: +98 21 22431661; Fax: +98 21 22431683

E-mail address: Mohammadbehbahani89@yahoo.com

**Table 1S.** Application of the introduced sample preparation method for analysis of target ions in certified reference materials.

| Sample              | Element | Concentration (mg kg <sup>-1</sup> ) |       | Relative error (%) |
|---------------------|---------|--------------------------------------|-------|--------------------|
|                     |         | Certified                            | Found |                    |
| Soil (NCS DC 73323) | Cd      | 0.45                                 | 0.44  | -2.2               |
|                     | Cu      | 144                                  | 142   | -1.4               |
